# Supplementary material
Source: PubMed Central journal article supplement (PMC5470391)
Supplement: jamaoncol-3-652-s001.pdf [file jamaoncol-3-652-s001.pdf]

## Supplementary Online Content

Royce TJ, Chen M-H, Wu J, et al. Surrogate end points for all-cause mortality in men with localized unfavorable-risk prostate cancer treated with radiation therapy vs radiation therapy plus androgen deprivation therapy: a secondary analysis of a randomized clinical trial. *JAMA Oncol*. Published online January 12, 2017. doi:10.1001/jamaoncol.2016.5983.

**eTable 1.** Unadjusted and Adjusted Hazard Ratios for Clinical Characteristics, Candidate Surrogates and Treatment for the Risk of All-Cause Mortality

This supplementary material has been provided by the authors to give readers additional information about their work.

**eTable 1. Unadjusted and Adjusted Hazard Ratios for Clinical Characteristics, Candidate Surrogates and Treatment for the Risk of All-Cause Mortality**

| Covariate         | Men<br>N(%) | Deaths<br>N(%) | Candidate Surrogate |         |                   |         |                        |         |                   |         |                    |         |                   |         |                                 |         |                   |        |
|-------------------|-------------|----------------|---------------------|---------|-------------------|---------|------------------------|---------|-------------------|---------|--------------------|---------|-------------------|---------|---------------------------------|---------|-------------------|--------|
|                   |             |                | PSA Failure         |         |                   |         | PSA nadir (>0.5 ng/mL) |         |                   |         | PSA DT (<9 months) |         |                   |         | Int to PSA failure (<30 months) |         |                   |        |
|                   |             |                | UHR                 |         | AHR               |         | UHR                    |         | AHR               |         | UHR                |         | AHR               |         | UHR                             |         | AHR               |        |
| HR (CI)           | P           | HR (CI)        | P                   | HR (CI) | P                 | HR (CI) | P                      | HR (CI) | P                 | HR (CI) | P                  | HR (CI) | P                 | HR (CI) | P                               | HR (CI) | P                 |        |
| Log PSA (ng/mL)   | 157 (100)   | 110 (100)      | 1.17 (0.85, 1.61)   | 0.35    | 1.26 (0.88, 1.81) | 0.21    | 1.17 (0.85, 1.61)      | 0.35    | 1.23 (0.87, 1.75) | 0.24    | 1.17 (0.85, 1.61)  | 0.35    | 1.19 (0.86, 1.65) | 0.34    | 1.17 (0.85, 1.61)               | 0.35    | 1.25 (0.89, 1.77) | 0.23   |
| Age (years)       | 157 (100)   | 110 (100)      | 1.08 (1.04, 1.12)   | <0.001  | 1.08 (1.04, 1.12) | <0.001  | 1.08 (1.04, 1.12)      | <0.001  | 1.08 (1.04, 1.12) | <0.001  | 1.08 (1.04, 1.12)  | <0.001  | 1.08 (1.04, 1.12) | <0.001  | 1.08 (1.04, 1.12)               | <0.001  | 1.08 (1.04, 1.12) | <0.001 |
| 1992 AJCC T stage |             |                |                     |         |                   |         |                        |         |                   |         |                    |         |                   |         |                                 |         |                   |        |
| T2                | 76 (48)     | 51 (46)        | 0.94 (0.64, 1.37)   | 0.73    | 0.85 (0.57, 1.2)  | 0.42    | 0.94 (0.64, 1.37)      | 0.73    | 0.87 (0.59, 1.3)  | 0.50    | 0.94 (0.64, 1.37)  | 0.73    | 0.88 (0.59, 1.2)  | 0.38    | 0.94 (0.64, 1.37)               | 0.73    | 0.89 (0.59, 1.2)  | 0.41   |

|               |            |            |                                     |      |                                     |      |                                 |      |                                     |      |                                     |      |                                     |      |                                     |      |                                     |      |
|---------------|------------|------------|-------------------------------------|------|-------------------------------------|------|---------------------------------|------|-------------------------------------|------|-------------------------------------|------|-------------------------------------|------|-------------------------------------|------|-------------------------------------|------|
|               |            |            | 7)                                  | -    | 7)                                  | -    |                                 | -    | 0)                                  | -    | 7)                                  | -    | 5)                                  | -    | 7)                                  | -    | 6)                                  | -    |
| T1            | 81<br>(52) | 59<br>(54) | 1.0<br>(ref)                        | -    | 1.0<br>(ref)                        | -    | 1.0<br>(ref)                    | -    | 1.0<br>(ref)                        | -    | 1.0<br>(ref)                        | -    | 1.0<br>(ref)                        | -    | 1.0<br>(ref)                        | -    | 1.0<br>(ref)                        | -    |
| Highest GS    |            |            |                                     |      |                                     |      |                                 |      |                                     |      |                                     |      |                                     |      |                                     |      |                                     |      |
| 8-10          | 18<br>(11) | 14<br>(13) | 1.9<br>5<br>(1.0<br>3,<br>3.6<br>0) | 0.04 | 1.6<br>2<br>(0.8<br>4,<br>3.1<br>3) | 0.15 | 1.95<br>(1.0<br>3,<br>3.60<br>) | 0.04 | 1.8<br>0<br>(0.9<br>3,<br>3.4<br>8) | 0.08 | 1.9<br>5<br>(1.0<br>3,<br>3.6<br>0) | 0.04 | 1.4<br>9<br>(0.7<br>7,<br>2.9<br>1) | 0.24 | 1.9<br>5<br>(1.0<br>3,<br>3.6<br>0) | 0.04 | 1.5<br>6<br>(0.8<br>0,<br>3.0<br>3) | 0.19 |
| 7             | 91<br>(58) | 66<br>(60) | 1.4<br>6<br>(0.9<br>4,<br>2.2<br>7) | 0.09 | 1.5<br>8<br>(0.9<br>7,<br>2.5<br>9) | 0.07 | 1.46<br>(0.9<br>4,<br>2.27<br>) | 0.09 | 1.6<br>2<br>(1.0<br>0,<br>2.6<br>4) | 0.05 | 1.4<br>6<br>(0.9<br>4,<br>2.2<br>7) | 0.09 | 1.4<br>8<br>(0.9<br>0,<br>2.4<br>3) | 0.12 | 1.4<br>6<br>(0.9<br>4,<br>2.2<br>7) | 0.09 | 1.5<br>0<br>(0.9<br>2,<br>2.4<br>5) | 0.11 |
| ≤6            | 48<br>(31) | 30<br>(27) | 1.0<br>(ref)                        | -    | 1.0<br>(ref)                        | -    | 1.0<br>(ref)                    | -    | 1.0<br>(ref)                        | -    | 1.0<br>(ref)                        | -    | 1.0<br>(ref)                        | -    | 1.0<br>(ref)                        | -    | 1.0<br>(ref)                        | -    |
| Treatm<br>ent |            |            |                                     |      |                                     |      |                                 |      |                                     |      |                                     |      |                                     |      |                                     |      |                                     |      |
| RT+A<br>DT    | 78<br>(50) | 53<br>(48) | 0.6<br>8<br>(0.4<br>7,<br>0.9<br>9) | 0.04 | 0.8<br>5<br>(0.5<br>5,<br>1.3<br>1) | 0.45 | 0.68<br>(0.4<br>7,<br>0.99<br>) | 0.04 | 1.0<br>2<br>(0.6<br>2,<br>1.6<br>6) | 0.95 | 0.6<br>8<br>(0.4<br>7,<br>0.9<br>9) | 0.04 | 0.8<br>0<br>(0.5<br>4,<br>1.2<br>0) | 0.28 | 0.6<br>8<br>(0.4<br>7,<br>0.9<br>9) | 0.04 | 0.8<br>0<br>(0.5<br>3,<br>1.2<br>0) | 0.27 |
| RT            | 79         | 57         | 1.0                                 | -    | 1.0                                 | -    | 1.0                             | -    | 1.0                                 | -    | 1.0                                 | -    | 1.0                                 | -    | 1.0                                 | -    | 1.0                                 | -    |

|               |                  |                  |                                     |      |                                     |      |                                  |            |                                     |      |                                     |            |                                     |           |                                     |           |                                     |      |
|---------------|------------------|------------------|-------------------------------------|------|-------------------------------------|------|----------------------------------|------------|-------------------------------------|------|-------------------------------------|------------|-------------------------------------|-----------|-------------------------------------|-----------|-------------------------------------|------|
|               | (50<br>)         | (52<br>)         | (ref<br>)                           |      | (ref<br>)                           |      | (ref<br>)                        |            | (ref<br>)                           |      | (ref<br>)                           |            | (ref<br>)                           |           | (ref<br>)                           |           | (ref<br>)                           |      |
| Surrogate (t) | 157<br>(10<br>0) | 110<br>(100<br>) | 1.5<br>6<br>(1.0<br>5,<br>2.3<br>0) | 0.03 | 1.4<br>7<br>(0.9<br>3,<br>2.3<br>2) | 0.10 | 5.76<br>(2.4<br>0,<br>13.8<br>3) | <0.0<br>01 | 1.7<br>2<br>(1.1<br>7,<br>2.5<br>2) | 0.01 | 2.1<br>7<br>(1.4<br>1,<br>3.3<br>3) | <0.0<br>01 | 2.0<br>6<br>(1.2<br>9,<br>3.2<br>8) | 0.00<br>3 | 1.8<br>9<br>(1.2<br>0,<br>2.9<br>8) | 0.00<br>6 | 1.7<br>6<br>(1.0<br>6,<br>2.9<br>2) | 0.03 |
| PTE<br>value  |                  |                  | Not Estimable                       |      |                                     |      | 103.86%                          |            |                                     |      | 43.09%                              |            |                                     |           | 41.26%                              |           |                                     |      |

Abbreviations: PSA, prostate-specific antigen; DT, doubling time; Int, interval; UHR, unadjusted hazard ratio; AHR, adjusted hazard ratio; CI, 95% confidence interval; P, P value; AJCC, American Joint Commission on Cancer; Ref, reference; GS, Gleason score; ADT, androgen deprivation therapy; RT, radiation therapy; Obs, observed; PTE, proportion of the treatment effect explained.
